# Supplementary material for: Paternally Transmitted Mitochondria Express a New Gene of Potential Viral Origin
Source: Genome Biol Evol. 2014 Feb 5;6(2):391–405. doi: 10.1093/gbe/evu021 (PMC3942028; doi:10.1093/gbe/evu021)
Supplement: Supplementary Data [file supp_evu021_Supp-fig1.pdf]

**Supplemental Figure 1.** Protein secondary structure prediction of RPHM21 and the ubiquitin ligase MK3. Both proteins showed two transmembrane regions. N-terminus and C-terminus "outside". (Quick2D; [http://toolkit.tuebingen.mpg.de/quick2\\_d](http://toolkit.tuebingen.mpg.de/quick2_d)). RPHM21 (from the M-type complete mitochondrial genome, GenBank: AB065374). MK3 of Murid herpesvirus 4 (NCBI Reference Sequence: NP\_044852.1).

## RPHM21

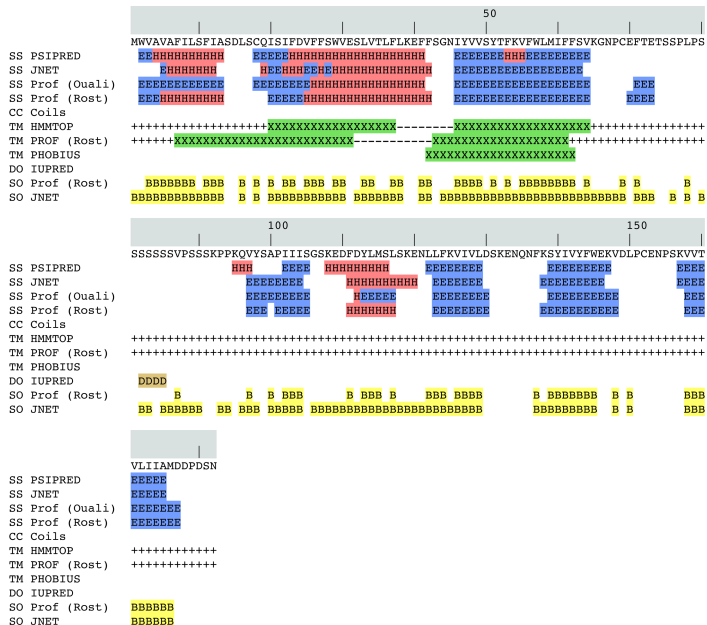

## MK3

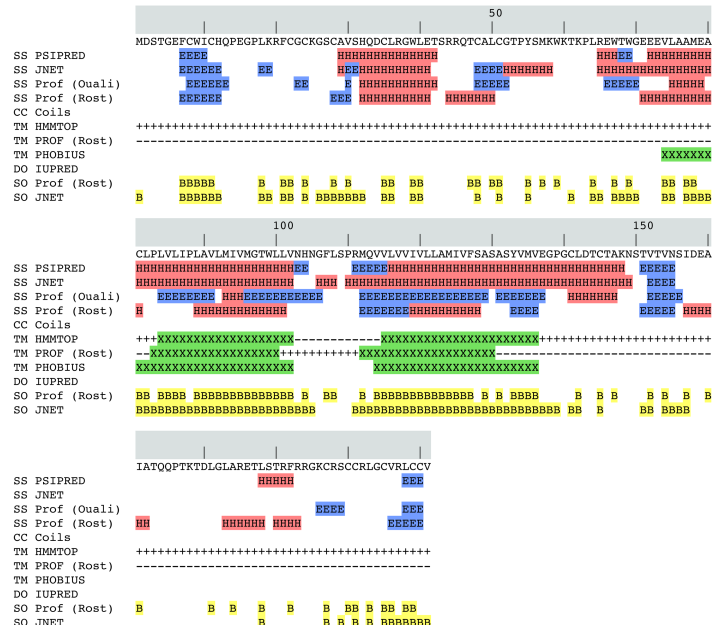

SS = Alpha-Helix Beta-Sheet Secondary Structure  
 CC = Coiled Coils  
 TM = Transmembrane ('+'=outside, '-'=inside)  
 DO = Disorder  
 SO = Solvent accessibility (A buried residue has at most 25% of its surface exposed to the solvent.)

SS = Alpha-Helix Beta-Sheet Secondary Structure  
 CC = Coiled Coils  
 TM = Transmembrane ('+'=outside, '-'=inside)  
 DO = Disorder  
 SO = Solvent accessibility (A buried residue has at most 25% of its surface exposed to the solvent.)
